# Supplementary material
Source: publisher figshare collection journal article supplement (https://acs.figshare.com/ndownloader/files/14602334)
Supplement: Supplementary file 1 [file 14602334]

### Supplement 3

The measurements of viscosity,  $\eta$  and of the specific conductance,  $\Lambda_0$ , are shown for  $\text{CaCO}_3$  supersaturated solutions containing different MEG concentrations, at constant ionic strength and temperature. The total solution volume in which measurements were done was 50ml. For viscosity measurement, a Couette viscometer was used and for the limiting conductance ( $\Lambda_0 = \text{Conductivity} \times \text{Volume of solution}$ ) measurements, a conductivity meter with the appropriate cell (Conductivity meter, Metrohm 660) was also used. The results of the measurements and Walden's product calculated are shown in Table S3.1

**Table S3.1. Viscosity, specific conductance and Walden's constant for different MEG- water mixtures; ionic strength,  $I=0.1$  M,  $25^\circ\text{C}$**

| % v/v MEG | Limiting Conductance. $\Lambda_0$ /<br>( $\text{S}\cdot\text{cm}^2\cdot\text{mol}^{-1}$ ) | Viscosity.<br>$\eta$ /( $\text{mPa}\cdot\text{s}$ ) | Walden product,<br>$W=\eta\Lambda_0$<br>( $\text{S}\cdot\text{cm}^2\cdot\text{mol}^{-1}$ ) $\cdot$ ( $\text{mPa}\cdot\text{s}$ ) |
|-----------|-------------------------------------------------------------------------------------------|-----------------------------------------------------|----------------------------------------------------------------------------------------------------------------------------------|
| 10        | 199.86                                                                                    | 5.58                                                | 1115.63                                                                                                                          |
| 20        | 145.00                                                                                    | 7.26                                                | 1053.20                                                                                                                          |
| 30        | 120.14                                                                                    | 8.73                                                | 1048.66                                                                                                                          |
| 40        | 94.90                                                                                     | 9.45                                                | 896.94                                                                                                                           |
| 50        | 79.18                                                                                     | 9.66                                                | 764.88                                                                                                                           |
| 60        | 53.09                                                                                     | 10.99                                               | 583.20                                                                                                                           |
| 70        | 38.98                                                                                     | 11.43                                               | 445.56                                                                                                                           |
| 80        | 28.74                                                                                     | 14.73                                               | 423.46                                                                                                                           |
| 90        | 18.98                                                                                     | 17.56                                               | 333.28                                                                                                                           |

The values of the dielectric constant for the MEG-Water solutions are summarized in Table S3.2.

**Table S3.2.** Dielectric constant of water-MEG mixtures;  $25^\circ\text{C}$  (from Ref.41: Akerlöf G. Dielectric constants of some organic solvent-water mixtures at various temperatures, *J. Am. Chem. Soc.*, **1932**, 54, 4125–4139.)

| %v/v MEG | $\epsilon$ |
|----------|------------|
| 0        | 80.37      |
| 10       | 74.60      |
| 20       | 68.70      |
| 30       | 62.63      |
| 40       | 56.49      |
| 50       | 50.38      |
| 60       | 44.67      |
| 70       | 39.14      |
| 80       | 33.89      |
| 90       | 44.90      |
